# Supplementary material for: The role of C-O-H-F-Cl fluids in the making of Earth’s continental roots
Source: Nat Commun. 2025 Aug 22;16:7842. doi: 10.1038/s41467-025-62888-3 (PMC12373800; doi:10.1038/s41467-025-62888-3)
Supplement: Supplementary file 4 — Supplementary Data 2 [file 41467_2025_62888_MOESM4_ESM.xlsx]

## Sheet: LA-ICP-MS standards_Oct_2023
2023-10-01
Standard	BIR-1G						BHVO-2G						In-house Clinopyroxene (BD3575)
	n=6						n=6						n=6
	Avg.	Stdev.	Lit.	\% rsd	Accuracy		Avg.	Stdev.	Lit.	\% rsd	Accuracy		Avg.	Stdev.
Sc45	40.305	1.38624	43	0.0529985	93.7326		30.4233	0.892808	33	0.054061	92.1919		4830.23	22048.7
Ti47	6061.47	149.718	5400	0.214396	112.249		16241.4	649.853	16300	0.208673	99.6402		2373.01	51.2475
V51	338.793	9.6711	326	0.0931409	103.924		315.495	12.2697	308	0.0886785	102.433		433.465	538.815
Co59	46.4367	1.81855	52.5	0.0998674	88.4508		58.6367	1.52368	43	0.0815625	136.364		40.51	0.746378
Sr88	108.687	4.07572	109	0.0550988	99.7125		376.397	9.73517	396	0.0403503	95.0497		83.485	2.69524
Y89	12.4817	0.693554	14.3	0.0711156	87.2844		21.4767	0.435461	26	0.0878142	82.6026		4.25167	0.122052
Zr90	12.5067	0.866872	14	0.0624207	89.3333		148.963	2.46329	170	0.0852914	87.6255		14.705	0.245988
Nb93	0.522833	0.0266715	0.52	0.0946064	100.545		18.18	0.460043	18.3	0.0517949	99.3443		0.135167	0.00806019
Ba137	6.57667	0.229231	6.5	0.0907873	101.179		128.628	2.58485	131	0.0428283	98.1896		0.142833	0.0290201
La139	0.557833	0.0595766	0.609	0.046958	91.5982		14.2167	0.407611	15.2	0.0631548	93.5307		1.06767	0.0535823
Ce140	1.875	0.0568331	1.89	0.0993051	99.2063		35.8833	1.11437	37.6	0.0449216	95.4344		4.31833	0.0915241
Pr141	0.3575	0.0267414	0.37	0.0980592	96.6216		4.88333	0.18875	5.35	0.0481728	91.2773		0.802667	0.0284792
Nd143	2.19333	0.294392	2.37	0.0598791	92.5457		22.4467	0.70537	24.5	0.0737084	91.619		4.40667	0.319166
Sm147	1.02333	0.0265832	1.09	0.0680815	93.8838		5.57833	0.258567	6.1	0.0616121	91.4481		1.345	0.0703562
Eu153	0.512	0.0529641	0.517	0.086571	99.0329		2.06	0.085557	2.07	0.0582941	99.5169		0.471167	0.0241695
Gd157	1.48	0.161369	1.85	0.105072	80		5.15333	0.113431	6.16	0.0930084	83.658		1.31	0.120333
Tb159	0.305833	0.0234556	0.35	0.0977075	87.381		0.7685	0.0708597	0.92	0.094393	83.5326		0.202667	0.0145281
Dy163	2.19333	0.258741	2.55	0.0533319	86.0131		4.55833	0.214422	5.28	0.0824123	86.3321		1.14833	0.076309
Ho165	0.494833	0.0459191	0.56	0.058489	88.3631		0.87	0.0400849	0.98	0.109226	88.7755		0.175667	0.0123072
Er166	1.361	0.091538	1.7	0.0829852	80.0588		2.2	0.112606	2.56	0.0777804	85.9375		0.382	0.0323728
Tm169	0.2015	0.0128957	0.24	0.061106	83.9583		0.285667	0.011003	0.34	0.119086	84.0196		0.0450667	0.0085729
Yb172	1.32333	0.0335837	1.64	0.0588478	80.6911		1.623	0.0866603	2.01	0.0497327	80.7463		0.205	0.0260077
Lu175	0.213167	0.0266939	0.248	0.124849	85.9543		0.241333	0.0166813	0.279	0.168191	86.4994		0.0289667	0.00510477
Hf178	0.462667	0.0776496	0.57	0.133456	81.1696		3.845	0.146799	4.32	0.0489954	89.0046		0.8515	0.134147
Ta181	0.0297333	0.00787672	0.036	0.174298	82.5926		1.06333	0.0811632	1.15	0.0457481	92.4638		0.00836667	0.00154229
Pb208	3.55333	0.334883	3.7	0.148199	96.036		1.78667	0.149488	1.7	0.0604449	105.098		0.1825	0.0472895
Th232	0.0253833	0.00313076	0.03	0.17203	84.6111		1.14333	0.0555542	1.22	0.0567419	93.7158		0.0118833	0.00187127
U238	0.0183	0.00143248	0.023	0.16743	79.5652		0.428667	0.0223577	0.403	0.0927011	106.369		0.00287833	0.00107231

## Sheet: EPMA_calibration standards
	Mineral	Olivine		Clinopyroxene		Orthopyroxene		Garnet		Phlogopite
	Hv (kV)	15		15		15		15		20
	I (nA)	20		20		20		20		10
	Beam size (µm)	5		5		5		5		5
Element	Calibration Standard	st.dev (wt.%)	det.lim (ppm)	st.dev (wt.%)	det.lim (ppm)	st.dev (wt.%)	det.lim (ppm)	st.dev (wt.%)	det.lim (ppm)	st.dev (wt.%)	det.lim (ppm)
Si	Diopside	0.47	400	0.65	400	0.46	620	0.37	580	0.45	700
Cr	Cr	0.02	250	0.05	280	0.03	250	0.07	360	0.057	500
Fe	Fayalite	0.34	620	0.13	500	0.17	520	0.23	580	0.14	500
Mn	Mn-Metal	0.04	440	0.04	450	0.04	430	0.05	460	0.04	500
Mg	St. Johns Olivine	1.25	450	0.46	330	0.33	470	0.11	250	0.51	540
Ni	NiO	0.033	330	0.03	350	0.03	330	0.03	340
Ca	Diopside	0.013	150	0.36	280	0.02	150	0.08	230	0.036	380
Na	Jadeite	0.025	290	0.086	340	0.03	270	0.03	300	0.035	300
Al	Corundum	0.005	58	0.014	57	0.01	70	0.28	360	0.2	320
Ti	Rutile	0.018	200	0.02	210	0.02	220	0.02	205	0.036	215
K	K-Feldspar					0.03	360	0.03	320	0.18	220
F	LiF									0.28	2700
Cl	Halite									0.01	125

## Sheet: EPMA recovery & precision
EPMA standard recovery and precision using in-house standards at the University of Cambridge
Standard		Na2O	SiO2	MgO	Al2O3	CaO	TiO2	FeO	Cr2O3	MnO	NiO	K2O	F	Cl
Augite1
	Ref.	0.83	50.98	17.24	7.27	17.36	0.48	4.79		0.14
	avg.	0.84	50.89	17.2	7.14	17.13	0.48	4.75	0.92	0.1	0.05
	st.dev	0.02	0.23	0.18	0.09	0.04	0.01	0.07	0.02	0.05	0.01
	% rsd	0.03	0	0.01	0.01	0	0.01	0.01	0.02	0.5	0.21
	% rep	1.01	1	1	0.98	0.99	1	0.99		0.73
Augite2
	Ref.	0.86	50.74	17.13	7.49	17.34	0.49	4.79		0.14
	avg.	0.86	50.38	16.11	7.38	17.22	0.5	4.78	0.9	0.15	0.06
	st.dev	0	0	1.2	0	0	0		0	0	0
	% rsd	0	0	0.07	0	0	0	0	0	0	0
	% rep	1	0.99	0.94	0.99	0.99	1.01	1		1.07
Diopside1
	Ref.	0.13	55.68	18.23	0.15	25.93	0.01	0.23		0.03
	avg.	0.21	55.53	17.87	0.29	25.43	0.02	0.25		0.02
	st.dev	0.03	0.29	0.23	0.04	0.07	0	0.03		0.01
	% rsd	0.14	0.01	0.01	0.14	0	0.18	0.11		0.64
	% rep	1.11	0.99	0.99	1.12	0.98	1.09	1.04		0.6
SanCarlos Olivine1
	Ref.		41.23	49.1	0.04	0.13		9.93	0.01	0.15	0.38
	avg.	0	41.1	48.89	0.03	0.11	0	9.75	0.02	0.14	0.38
	st.dev	0	0.11	0.38	0	0	0	0.05	0	0	0.01
	% rsd	1.23	0	0.01	0.03	0.02	0.72	0.01	0.12	0.03	0.02
	% rep		1	1	0.83	0.82		0.98	2.29	0.94	0.99
SanCarlos Olivine2
	Ref.		40.96	49.03	0.04	0.11		9.94	0.02	0.15	0.38
	avg.	0.01	41.19	48.72	0.03	0.11	9.62	0.02	0.1	0.38
	st.dev	0.01	0.27	1.21	0	0	0.09	0.01	0.07	0.01
	% rsd	0.88	0.01	0.02	0.08	0.04	0.01	0.4	0.63	0.03
	% rep		1.01	0.99	0.87	0.98		0.97	0.97	0.69	1
SanCarlos Olivine3
	Ref.		41.22	48.81	0.04	0.11		9.8	0.01	0.15	0.36
	avg.	0.01	41.1	48.82	0.03	0.1	0.01	9.7	0.01	0.08	0.37
	st.dev	0.01	0.25	0.5	0	0	0	0.09	0	0.08	0.01
	% rsd	0.81	0.01	0.01	0.04	0.04	0.6	0.01	0.21	1.09	0.03
	% rep		1	1	0.83	0.95		0.99	1.43	0.51	1.04
Rhyolite
	Ref.	3.65	77.23	0.02	12.12	0.42	0.07	1.02	0	0.01		5.04	0.24	0.11
	avg.	3.73	77.22	0.04	11.91	0.44	0.08	1.12				5.11	0.21	0.11
	st.dev	0.09	0.86	0.01	0.2	0.03	0.01	0.05				0.07	0.08	0.01
	% rsd	0.02	0.01	0.39	0.02	0.07	0.17	0.04				0.01	0.37	0.08
	% rep	1.02	1	1.58	0.98	1.04	1.06	1.1				1.01	0.89	0.94
Basalt
	Ref.	2.64	50.99	7.91	14.88	11.17	1.36	9.12	0.06	0.2		0.09	0.02	0
	avg.	2.83	51.01	7.98	14.26	11.04	1.33	9.11	0.03	0.18		0.08
	st.dev	0.06	0.56	0.09	0.22	0.13	0.02	0.12	0.02	0.03		0.01
	% rsd	1.97	1.09	1.08	1.53	1.22	1.4	1.34	59.13	15.9		9.25
	% rep	1.07	1	1.01	0.96	0.99	0.98	1	0.54	0.89		0.87
Hornblende
	Ref.	2.6	40.37	12.8	14.9	10.3	4.73	11.25		0.09		2.05
	avg.	2.79	39.98	12.47	13.61	10.07	4.86	10.65	0.01	0.09		2.14	0.2	0.02
	st.dev	0.13	0.43	0.19	0.25	0.14	0.06	0.12	0.02	0.02		0.04	0.07	0
	% rsd	0.04	0.01	0.01	0.02	0.01	0.01	0.01	2.06	0.24		0.02	0.37	0.18
	% rep	1.07	0.99	0.97	0.91	0.98	1.03	0.95		0.98		1.04
