# Supplementary material for: The role of C-O-H-F-Cl fluids in the making of Earth’s continental roots
Source: Nat Commun. 2025 Aug 22;16:7842. doi: 10.1038/s41467-025-62888-3 (PMC12373800; doi:10.1038/s41467-025-62888-3)
Supplement: Supplementary file 6 — Supplementary Data 4 [file 41467_2025_62888_MOESM6_ESM.xlsx]

## Sheet: Sheet1
Gibson et al. (2025)
Phlogopite analyses
BD2125	Na2O	F	SiO2	MgO	K2O	Cl	CaO	TiO2	FeO	MnO	Al2O3	Cr2O3	Total
2 / 1 .	0.096	0.4121	41.9034	25.4562	10.7492	0.1766	0.0592	0.1107	2.4004		12.6174	0.8407	94.8219
3 / 1 .	0.0799	0.3898	41.7788	24.8625	10.9487	0.1634	0.0279	0.1435	2.4428		12.459	0.8672	94.1635
4 / 1 .	0.074	0.6061	41.7117	25.095	10.9374	0.1693	0.0234	0.1323	2.4167		12.4738	0.8201	94.4598
5 / 1 .	0.0542	0.493	41.5671	25.3588	10.7965	0.1793	0.0374	0.1274	2.4437		12.5468	0.8445	94.4487
6 / 1 .	0.0863	0.4973	41.4099	25.164	10.5684	0.1637	0.0865	0.126	2.4492		12.3842	0.8529	93.7884
7 / 1 .	0.0482	0.5647	41.7788	25.2714	10.711	0.1531	0.1439	0.1059	2.5007		12.6002	0.8307	94.7086
BD1141A	Na2O	F	SiO2	MgO	K2O	Cl	CaO	TiO2	FeO	MnO	Al2O3	Cr2O3	Total
A	0.22096	0.46946	41.1717	24.2036	10.6142	0.04324	0.05345	0.98972	3.085	0.0192	11.0893	0.45674	92.4166
B	0.185	0.4624	41.4364	24.7006	10.7644	0.0432		0.97694	3.12034	0.02384	11.2	0.48342	93.3965
C	0.189125	0.47015	41.7758	24.7202	10.7717	0.0437	0.1272	0.9739	3.13318	0.021025	11.1642	0.48965	93.8799
CRIM	0.19376	0.49704	41.9004	24.8576	10.8528	0.04484	0.016	1.0059	3.17834	0.01408	11.2698	0.47456	94.3052
D	0.210433	0.440067	42.2251	25.022	11.0262	0.0411667	0.00196667	1.00637	3.22327	0.0227667	11.5664	0.469833	95.2556
E	0.241267	0.506167	41.886	24.9291	10.8959	0.0489333	0.0255	0.9869	3.26433		11.375	0.486267	94.6453
F	0.22348	0.470533	41.866	24.8876	10.8833	0.04754	0.03616	0.99608	3.24004	0.01458	11.3402	0.4854	94.4909
G	0.2185	0.4656	41.3968	24.7204	10.6898	0.03845	0.0802	1.0072	3.21175	0.02025	11.6137	0.5154	93.9781
H	0.20256	0.44214	41.4152	24.9491	10.585	0.04014	0.0473	0.98294	3.21414	0.02806	11.4431	0.46712	93.8168
BD3067	Na2O	F	SiO2	MgO	K2O	Cl	CaO	TiO2	FeO	MnO	Al2O3	Cr2O3	Total
1 / 1 .	0.1165	0.2899	41.9004	30.8446	6.8051		0.0762	0.4915	2.8719	0.0736	7.8342	0.0845	91.3884
2 / 1 .	0.1654	0.3476	42.4031	32.0681	5.9983		0.1229	0.474	2.4196	0.0697	7.3052	0.1064	91.4803
3 / 1 .	0.1698	0.4834	41.4681	25.4021	9.7075		0.0359	0.8548	4.1409	0.0604	12.2497	0.2094	94.782
4 / 1 .	0.1486	0.7317	41.6953	24.9392	10.6999		0.0826	0.8007	4.0835	bdl	12.0379	0.1481	95.3675
5 / 1 .	0.1276	0.6367	42.2305	25.764	10.458		0.0259	0.7609	4.0032	bdl	11.6287	0.1374	95.7729
6 / 1 .	0.1105	0.4149	42.2342	25.0694	10.9107		bdl	0.7894	4.2472	bdl	12.0169	0.1239	95.9171
7 / 1 .	0.1227	0.6611	41.9614	24.9434	11.0482		bdl	0.7994	4.2497	bdl	12.0864	0.179	96.0513
8 / 1 .	0.1942	0.5929	41.6248	24.8376	10.7295		0.0383	0.8352	3.8628	bdl	12.0223	0.3544	95.092
9 / 1 .	0.1283	0.6585	41.861	25.4623	10.2057		bdl	0.7269	4.1072	bdl	11.4837	0.1489	94.7825
10 / 1 .	0.1086	0.6228	42.3906	24.6996	11.1788		bdl	0.8207	4.2542	bdl	12.0587	0.1832	96.3172
11 / 1 .	0.1102	0.6327	41.993	25.1866	11.1072		bdl	0.8083	4.1804	bdl	11.9845	0.1633	96.1662
12 / 1 .	0.1111	0.6002	41.8606	25.01	10.8174		bdl	0.7969	4.4166	bdl	11.9705	0.1784	95.7617
